# Supplementary material
Source: MDPI journal article supplement (https://www.mdpi.com/search?q=pharmaceutics-10-00201)
Supplement: s001 [file pharmaceutics-10-00201-s001.pdf]

# Supplementary Material: New Insights on the Mechanism of Fatty Acids as Buccal Permeation Enhancers

Cristina Padula, Silvia Pescina, Sara Nicoli and Patrizia Santi

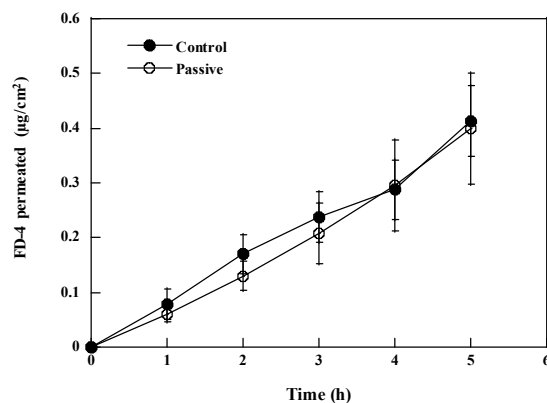

**Figure S1.** FD-4 permeation profiles across porcine esophageal epithelium without pre-treatment (passive) and with ethanol pre-treatment (control) (mean values  $\pm$  SEM).

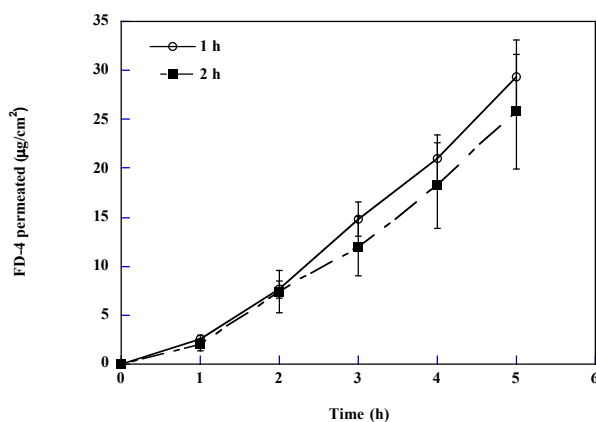

**Figure S2.** FD-4 permeation profiles across porcine esophageal epithelium after 1 or 2 h of pre-treatment with lauric acid 5% (mean values  $\pm$  SEM).
